# Supplementary material for: Functionalized anthradithiophenes for organic field-effect transistors
Source: Royal Society of Chemistry journal article supplement (doi:10.1039/b715746k), 2008-01-01
Supplement: b715746k.pdf [file b715746k.pdf]

## Supporting Information

# Fuctionalized Anthradithiophenes for Organic Field-Effect Transistors

Ming-Chou Chen,\*† Choongik Kim,‡ Sheng-Yu Chen,† Yen-Ju Chiang,† Ming-Che Chung,† Antonio Facchetti,\*‡ and Tobin J. Marks\*‡

*Department of Chemistry, National Central University, Chung-Li, Taiwan 32054, ROC and Department of Chemistry and the Materials Research Center, Northwestern University, 2145 Sheridan Rd., Evanston, Illinois 60208-3113, USA*

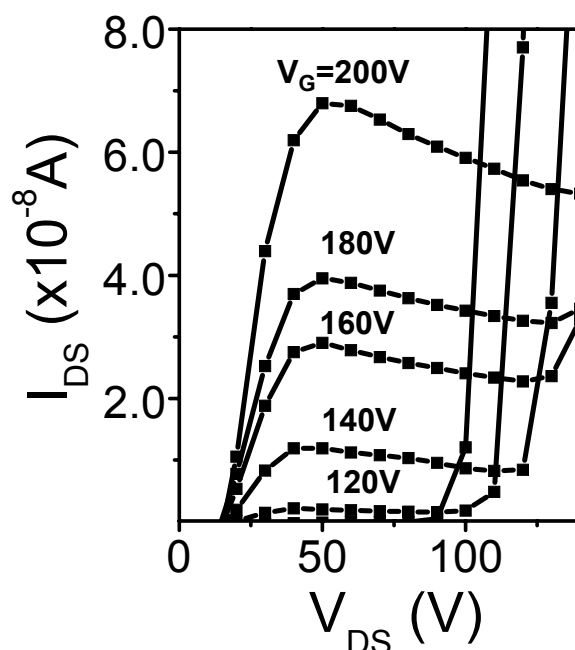

**Figure 1.** Output characteristics of 50 nm thick DFPADT FET as an n-channel semiconductor. Films were fabricated on HMDS-treated SiO<sub>2</sub> at 150 °C.

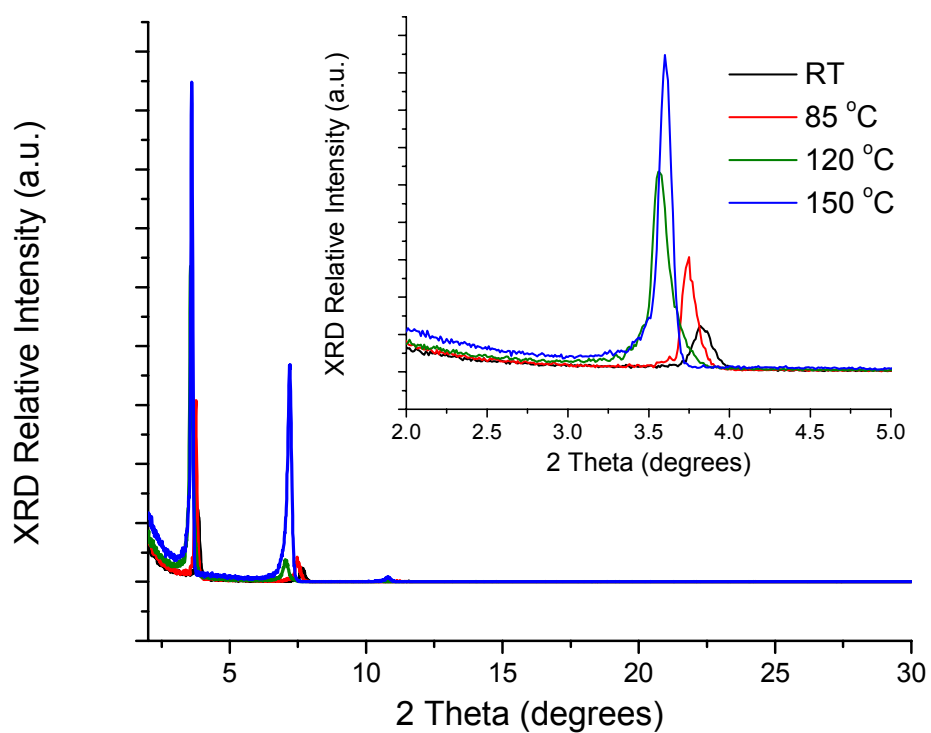

**Figure 2.** XRD pattern of 50 nm thick DFPADT films grown on HMDS-treated substrates at various substrate temperature (RT, 85, 120, and 150 °C).
